# Supplementary material for: Variation in rates of ICU readmissions and post-ICU in-hospital mortality and their association with ICU discharge practices
Source: Springer Nature journal article supplement (doi:10.1186/s12913-017-2234-z), 2017-04-17
Supplement: MOESM1 [file 12224180]

**Additional file 1.** Number of admissions excluded per exclusion criterion.

|                                                              | <i>n</i>            |
|--------------------------------------------------------------|---------------------|
| Total excluded from regression analyses                      | 17,141 <sup>a</sup> |
| ICU non-survivors during first intensive care unit admission | 6213                |
| ICU survivors discharged to a non-floor location             | 6151                |
| <b>APACHE IV exclusion criteria</b>                          |                     |
| Age less than 16 years                                       | 341                 |
| Length of stay less than 4 hours                             | 2683                |
| Length of stay greater than 365 days                         | 5                   |
| Died before admission                                        | 69                  |
| Patients with substantial burns                              | 75                  |
| Patients with transplants (except renal and hepatic)         | 123                 |
| Admission from another intensive care unit                   | 2807                |
| Missing admission type                                       | 1254                |
| Missing hospital discharge type                              | 270                 |
| Missing APACHE III score                                     | 69                  |
| Missing APACHE IV reason for admission                       | 1104                |
| Missing discharge location                                   | 234                 |

<sup>a</sup> The individual numbers in this table do not sum to the total, because some admissions are excluded for multiple reasons.
