# Supplementary material for: Variation in rates of ICU readmissions and post-ICU in-hospital mortality and their association with ICU discharge practices
Source: Springer Nature journal article supplement (doi:10.1186/s12913-017-2234-z), 2017-04-17
Supplement: MOESM4 [file 12224180]

**Additional file 4. Results questionnaire\***

| No.       | Question                                                                                                                             | n (%)      |
|-----------|--------------------------------------------------------------------------------------------------------------------------------------|------------|
| <b>1.</b> | <b>Function title</b>                                                                                                                |            |
|           | Head of ICU / medical manager                                                                                                        | 27 (36.0)  |
|           | Intensivist                                                                                                                          | 42 (56.0)  |
|           | Fellow                                                                                                                               | 0 (0.0)    |
|           | Nurse                                                                                                                                | 3 (4.0)    |
|           | Other                                                                                                                                | 3 (4.0)    |
| <b>2.</b> | <b>Discharge policy</b>                                                                                                              |            |
|           | Yes, approved by medical staff                                                                                                       | 32 (42.7)  |
|           | Yes, approved by medical staff and approved by hospital board                                                                        | 29 (38.7)  |
|           | Yes, approved by medical staff, approved by hospital board, and periodically tested and reported to medical staff and hospital board | 8 (10.7)   |
|           | Being developed                                                                                                                      | 1 (1.3)    |
|           | No                                                                                                                                   | 5 (6.7)    |
| <b>3.</b> | <b>Protocol NVIC guideline</b>                                                                                                       |            |
|           | Yes                                                                                                                                  | 68 (90.7)  |
|           | No                                                                                                                                   | 4 (5.3)    |
|           | Being developed                                                                                                                      | 3 (4.0)    |
| <b>4.</b> | <b>Protocol available (multiple answers possible)</b>                                                                                | (n = 68)   |
|           | Yes, on paper                                                                                                                        | 21 (28.0)  |
|           | Yes, electronically                                                                                                                  | 63 (84.0)  |
|           | Yes, with decision support                                                                                                           | 0 (0.0)    |
|           | No                                                                                                                                   | 0 (0.0)    |
| <b>5.</b> | <b>Set discharge criteria</b>                                                                                                        | (n = 74)   |
|           | Yes                                                                                                                                  | 66 (88.0)  |
|           | No                                                                                                                                   | 6 (8.0)    |
|           | Being developed                                                                                                                      | 2 (2.7)    |
| <b>6.</b> | <b>Discharge decision (multiple answers possible)</b>                                                                                | 75 (100.0) |
|           | Intensivist                                                                                                                          | 4 (5.3)    |
|           | Fellow                                                                                                                               | 2 (2.7)    |
|           | Resident                                                                                                                             | 3 (4.0)    |
|           | Nurse                                                                                                                                | 2 (2.7)    |
|           | Other                                                                                                                                |            |
| <b>7.</b> | <b>Responsibility discharge decision</b>                                                                                             |            |
|           | Yes                                                                                                                                  | 69 (92.0)  |
|           | No                                                                                                                                   | 6 (8.0)    |
| <b>8.</b> | <b>a. Basis on which discharge decision is taken (multiple answers possible)</b>                                                     |            |
|           | Discharge criteria                                                                                                                   | 53 (70.7)  |
|           | Knowledge / insight / experience                                                                                                     | 70 (93.3)  |
|           | Logistic reasons                                                                                                                     | 56 (74.7)  |
|           | Arguments based on nursing                                                                                                           | 63 (84.0)  |
|           | Other                                                                                                                                | 14 (18.7)  |
|           | <b>b. Percentage of patients discharged on specific basis [n (mean percentage/median percentage)]</b>                                | 48         |
|           | Discharge criteria                                                                                                                   | (66.2/80)  |
|           | Knowledge / insight / experience                                                                                                     | 64         |
|           | Logistic reasons                                                                                                                     | (63.5/80)  |

|            |                                                                                                              |              |
|------------|--------------------------------------------------------------------------------------------------------------|--------------|
|            | Arguments based on nursing                                                                                   | 51 (8.2/5)   |
|            | Other                                                                                                        | 55 (10.3/5)  |
|            |                                                                                                              | 11 (13.2/1)  |
| <b>9.</b>  | <b>Bed manager</b>                                                                                           |              |
|            | Yes, intensivist                                                                                             | 52 (69.3)    |
|            | Yes, fellow / resident                                                                                       | 4 (5.3)      |
|            | Yes, nurse                                                                                                   | 38 (50.7)    |
|            | No                                                                                                           | 4 (5.3)      |
| <b>10.</b> | <b>Percentage of patients with early discharge planning [<i>n</i> (mean percentage/median percentage)]</b>   | 72 (27.7/20) |
| <b>11.</b> | <b>Separated medical and nursing handover</b>                                                                |              |
|            | Yes                                                                                                          | 72 (96.0)    |
|            | No                                                                                                           | 3 (4.0)      |
| <b>12.</b> | <b>Methods of communication (multiple answers possible)</b>                                                  | 74 (98.7)    |
|            | Written or electronic nursing discharge form                                                                 | 73 (97.3)    |
|            | Verbal nursing handover                                                                                      | 62 (82.7)    |
|            | Medical discharge summary                                                                                    | 54 (72.0)    |
|            | Verbal medical handover                                                                                      | 8 (10.7)     |
|            | Other                                                                                                        |              |
| <b>13.</b> | <b>Content structured handover (multiple answers possible)</b>                                               | 74 (98.7)    |
|            | Summary ICU admission                                                                                        | 39 (52.0)    |
|            | Monitoring plan en planning of tests                                                                         | 70 (93.3)    |
|            | Treatment plan                                                                                               | 72 (96.0)    |
|            | List of medications                                                                                          | 66 (88.0)    |
|            | Allergy information                                                                                          | 58 (77.3)    |
|            | Revalidation information                                                                                     | 31 (41.3)    |
|            | Communication needs                                                                                          | 12 (16.0)    |
|            | Other                                                                                                        |              |
| <b>14.</b> | <b>Percentage of patients with medication reconciliation [<i>n</i> (mean percentage/median percentage)]</b>  | 73 (75.0/95) |
| <b>15.</b> | <b>Consulting ICU nurse</b>                                                                                  |              |
|            | Yes                                                                                                          | 70 (93.3)    |
|            | No                                                                                                           | 5 (6.7)      |
| <b>16.</b> | <b>Help with nursing activities</b>                                                                          |              |
|            | Yes, regularly                                                                                               | 53 (70.7)    |
|            | Yes, incidentally                                                                                            | 22 (29.3)    |
|            | No                                                                                                           | 0 (0.0)      |
| <b>17.</b> | <b>a. Monitoring post-ICU patients</b>                                                                       |              |
|            | Yes, Consulting ICU nurse                                                                                    | 45 (60.0)    |
|            | Yes, intensivist                                                                                             | 11 (14.7)    |
|            | Yes, other                                                                                                   | 15 (20.0)    |
|            | No                                                                                                           | 26 (34.7)    |
|            | <b>b. Percentage of patients monitored by specific person [<i>n</i> (mean percentage/median percentage)]</b> | 40 (66.7/80) |
|            | Yes, Consulting ICU nurse                                                                                    | (49.9/50)    |
|            | Yes, intensivist                                                                                             | 10 (16.0/10) |
|            | Yes, other                                                                                                   | 12 (66.7/80) |

---

**18. Medical emergency team**

|                 |           |
|-----------------|-----------|
| Yes             | 70 (93.3) |
| No              | 0 (0.0)   |
| Being developed | 5 (6.7)   |

---

\*Not all questions were included in the analyses
